# Supplementary material for: Mitochondrial Genome Sequences and Structures Aid in the Resolution of Piroplasmida phylogeny
Source: PLOS journal article supplement (doi:10.1371/journal.pone.0165702), 2016-11-10
Supplement: S1 (10.1371/journal.pone.0165702.s001) [file journal.pone.0165702.s001]

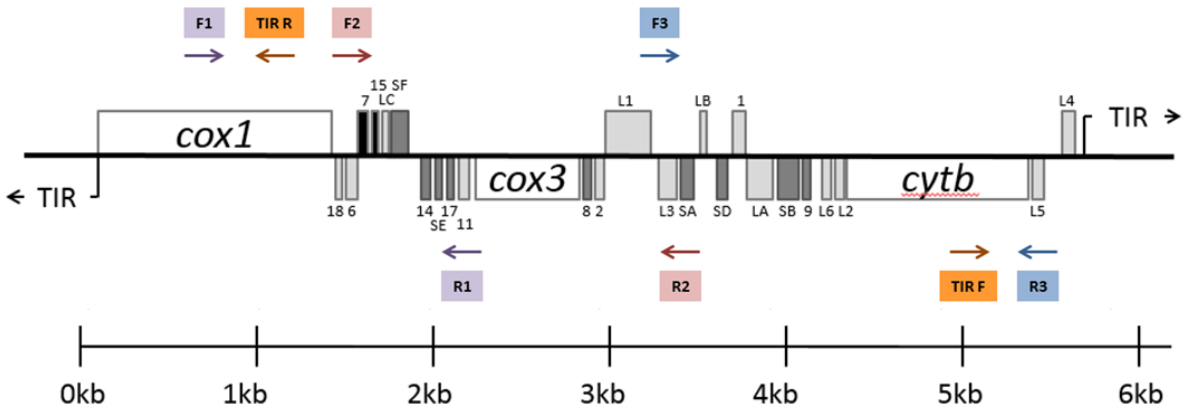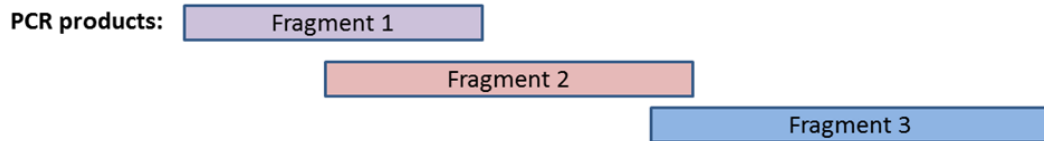

**S1 Figure. Schematic of PCR amplification of *B. canis*, *B. rossi*, and *C. felis* mitochondrial genomes.** Primers were designed to amplify near full length mitochondrial genomes in three overlapping fragments. Primers for fragments 1-3 and TIRs are indicated with arrows (forward primers: F1-F3, reverse primers: R1-R3, TIR primers: TIR F/R). Genes shown above the central line are coded on the sense strand, while those below are on the antisense strand. Protein-coding genes (*cox1*, *cox3*, and *cytb*) are indicated in white. Large subunit rRNA fragments are in light gray, small subunit rRNA fragments are in dark gray, and miscellaneous conserved RNA fragments are in black.
