# Supplementary material for: Mitochondrial Genome Sequences and Structures Aid in the Resolution of Piroplasmida phylogeny
Source: PLOS journal article supplement (doi:10.1371/journal.pone.0165702), 2016-11-10
Supplement: S2 (10.1371/journal.pone.0165702.s002) [file journal.pone.0165702.s002]

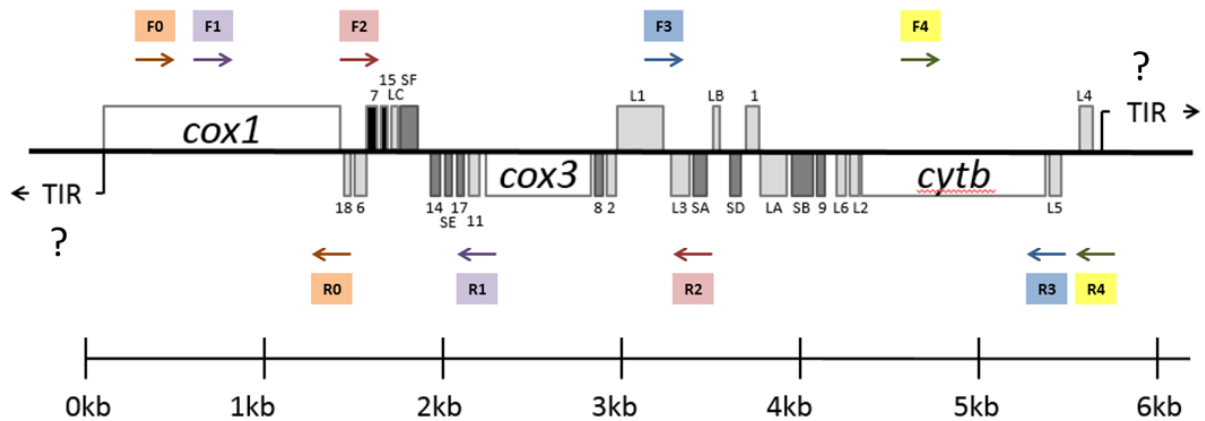

PCR products:

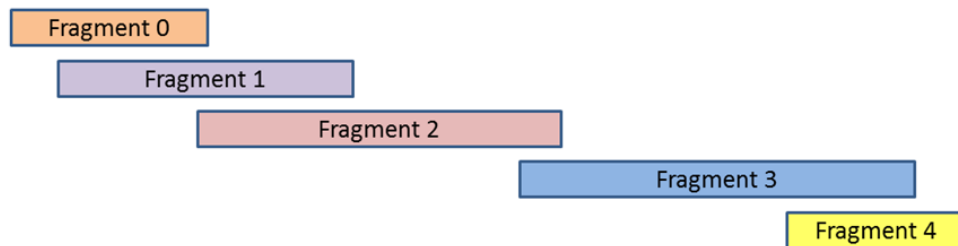

**S2 Figure. Schematic of PCR amplification of *B. vogeli* and *Babesia sp. Coco* mitochondrial genomes.** Because attempts at TIR amplifications were unsuccessful, primers were designed to amplify near full length mitochondrial genomes of species in five overlapping fragments. Primers for fragments 0-4 are indicated with arrows (forward primers: F0-F4, reverse primers: R0-R4). Protein-coding genes (*cox1*, *cox3*, and *cytb*) are indicated in white. Large subunit rRNA fragments are in light gray, small subunit rRNA fragments are in dark gray, and miscellaneous conserved RNA fragments are in black.
